# Supplementary material
Source: publisher site journal article supplement (https://www.degruyterbrill.com/publication/isbn/9783110301588/downloadAsset/9783110301588_Inhaltsverzeichnis.pdf)
Supplement: Supplementary file 1 [file 9783110301588_Inhaltsverzeichnis.pdf]

# Inhalt

- 1 Prolog: Paulus als Herausforderung — 1**
  - 1.1 Annäherung — 1
  - 1.2 Geschichtstheoretische Überlegungen — 1
    - Das Entstehen von Geschichte — 2
    - Geschichte als Sinnbildung — 6
    - Sinn- und Geschichtsbildung bei Paulus — 8
  - 1.3 Der Ansatz: Sinnbildung in Kontinuität und Wandel — 10
    - Sinn- und Identitätsbildung — 12
    - Die Grenzen des Konstruktivismus — 15
    - Kriterien für eine Paulusdarstellung — 17

## I. Hauptteil:

### **Der Lebens- und Denkweg — 27**

- 2 Quellen und Chronologie des paulinischen Wirkens: Sicheres und Vermutetes — 29**
  - 2.1 Die absolute Chronologie — 30
    - Das Claudius-Edikt — 30
    - Die Gallio-Inschrift — 30
  - 2.2 Die relative Chronologie — 31
    - Die Ereignisse vor Korinth — 31
    - Die Ereignisse nach Korinth — 35
    - Die Chronologie des paulinischen Wirkens — 38
- 3 Der vorchristliche Paulus: Ein weltoffener Eiferer — 39**
  - 3.1 Herkunft, Bildung und sozialer Status — 39
    - Herkunft aus Tarsus — 40
    - Paulus als römischer Bürger — 42
    - Die Bildung des Paulus — 45
    - Beruf und sozialer Status — 46
  - 3.2 Der Diasporapharisäer Paulus — 48
    - Die pharisäische Bewegung — 48
    - Paulus als Eiferer — 50
  - 3.3 Der religions- und bildungsgeschichtliche Hintergrund des paulinischen Denkens — 54
    - Der alttestamentlich-jüdische Hintergrund — 54
    - Die ‚New Perspective‘ on Paul — 59
    - Der griechisch-hellenistische Hintergrund — 62

|          |                                                                                            |            |
|----------|--------------------------------------------------------------------------------------------|------------|
|          | Paulus im Kontext antiker Prediger —                                                       | 64         |
|          | Die kulturellen Kontexte des Paulus —                                                      | 71         |
| 3.4      | Der Verfolger der ersten Gemeinden —                                                       | 74         |
|          | Der Ort der Verfolgung —                                                                   | 75         |
|          | Gründe für die Verfolgung —                                                                | 76         |
| <b>4</b> | <b>Die Berufung zum Völkerapostel: Der neue Horizont —</b>                                 | <b>78</b>  |
| 4.1      | Die Berichte über das Damaskusgeschehen —                                                  | 78         |
|          | Paulus über seine Berufung —                                                               | 78         |
|          | Das Zeugnis der Apostelgeschichte —                                                        | 84         |
| 4.2      | Die Tragweite des Damaskusgeschehens —                                                     | 88         |
|          | Der Erkenntnisgewinn —                                                                     | 88         |
|          | Die Folgen —                                                                               | 89         |
|          | Damaskus als Transzendenzerfahrung —                                                       | 91         |
| <b>5</b> | <b>Der christliche Paulus: Ein Vulkan beginnt zu brodeln —</b>                             | <b>95</b>  |
| 5.1      | Die Einübung: Paulus und die frühe christliche Tradition —                                 | 95         |
|          | Der irdische Jesus bei Paulus —                                                            | 97         |
| 5.2      | Die Bibel des Paulus —                                                                     | 100        |
|          | Die Verteilung der Zitate —                                                                | 102        |
| 5.3      | Erste Schritte als Missionar —                                                             | 103        |
| 5.4      | Paulus als Missionar der antiochenischen Gemeinde —                                        | 106        |
|          | Die Bedeutung von Antiochia —                                                              | 108        |
|          | Die 1. Missionsreise —                                                                     | 111        |
| <b>6</b> | <b>Der Apostelkonvent und der antiochenische Zwischenfall: Keine Lösung der Probleme —</b> | <b>114</b> |
| 6.1      | Der Apostelkonvent —                                                                       | 114        |
|          | Das Sachproblem —                                                                          | 116        |
|          | Der Verlauf —                                                                              | 117        |
|          | Das Evangelium der Unbeschnittenheit und der Beschneidung —                                | 119        |
|          | Die Interpretationen —                                                                     | 121        |
|          | Die Entstehung der verschiedenen Berichte —                                                | 124        |
| 6.2      | Der antiochenische Zwischenfall —                                                          | 126        |
|          | Differente Reinheitskonzepte —                                                             | 126        |
|          | Die Perspektive der Darstellung —                                                          | 129        |
| <b>7</b> | <b>Die selbständige Mission des Paulus: Der Vulkan bricht aus —</b>                        | <b>132</b> |
| 7.1      | Die Voraussetzungen der paulinischen Missionsarbeit —                                      | 132        |
|          | Griechisch als Weltsprache —                                                               | 132        |

|          |                                                                        |            |
|----------|------------------------------------------------------------------------|------------|
|          | Reisemöglichkeiten —                                                   | 134        |
|          | Religiöse Vielfalt —                                                   | 135        |
|          | Pax Romana —                                                           | 136        |
|          | Das Diasporajudentum —                                                 | 136        |
| 7.2      | Die Anfänge der selbständigen Mission —                                | 138        |
| 7.3      | Die Paulus-Schule und die Struktur der Gemeindegemeinschaft —          | 140        |
|          | Strukturen der Paulus-Schule —                                         | 142        |
|          | Missionsstrategien —                                                   | 147        |
|          | Hausgemeinden —                                                        | 149        |
|          | Theologie und Mission in Briefform —                                   | 154        |
| 7.4      | Das Selbstverständnis des Völkerapostels Paulus —                      | 158        |
| 7.5      | Die Herausbildung des frühen Christentums als eigenständige Bewegung — | 160        |
|          | Das Auseinandergehen —                                                 | 160        |
|          | Die Situation der Urgemeinde —                                         | 165        |
|          | Eine eigenständige Bewegung —                                          | 167        |
| <b>8</b> | <b>Paulus und die Thessalonicher: Trost und Zuversicht —</b>           | <b>175</b> |
| 8.1      | Die Vorgeschichte und die Erstverkündigung —                           | 175        |
|          | Die Gemeinde —                                                         | 175        |
|          | Die Erstverkündigung —                                                 | 177        |
| 8.2      | Die Theologie des 1Thessalonicherbriefes —                             | 180        |
|          | Erwählung und Parusie als Eckdaten —                                   | 180        |
|          | Nachahmersein in der Drangsal —                                        | 182        |
|          | Die Juden und Gottes Zorn —                                            | 183        |
|          | Die Ankunft des Herrn —                                                | 186        |
| 8.3      | Die Ethik des 1Thessalonicherbriefes —                                 | 190        |
| 8.4      | Der 1Thessalonicherbrief als Zeugnis frühpaulinischer Theologie —      | 193        |
|          | Ein Negativbefund —                                                    | 194        |
|          | Frühpaulinische Theologie —                                            | 196        |
| <b>9</b> | <b>Der 1Korintherbrief: Hohe und wahre Weisheit —</b>                  | <b>198</b> |
| 9.1      | Streit in Korinth —                                                    | 198        |
|          | Die Stadt Korinth —                                                    | 198        |
|          | Die Gemeinde —                                                         | 199        |
|          | Die Briefstruktur —                                                    | 200        |
|          | Spannungen in der Gemeinde —                                           | 201        |
| 9.2      | Die Weisheit der Welt und die Torheit des Kreuzes —                    | 203        |
|          | Gruppen in Korinth —                                                   | 203        |

|           |                                                       |            |
|-----------|-------------------------------------------------------|------------|
|           | Das Kreuz als Erkenntniskriterium —                   | 205        |
|           | Wahre Weisheit —                                      | 206        |
|           | Kulturgeschichtliche Hintergründe —                   | 210        |
|           | Unterschiedliche Identitätskonzepte —                 | 212        |
| 9.3       | Die Macht des Geistes und die Reinheit der Gemeinde — | 213        |
|           | Der Leib als Ort der Verantwortung —                  | 215        |
| 9.4       | Freiheit und Bindung in Christus —                    | 218        |
|           | Die ‚Starken‘ und die ‚Schwachen‘ —                   | 218        |
|           | Das paulinische Modell —                              | 219        |
|           | Freiheit als Dienst —                                 | 221        |
|           | Die Sklavenfrage —                                    | 222        |
| 9.5       | Die Kraft des Geistes und der Aufbau der Gemeinde —   | 224        |
|           | Die Gemeinde als Leib —                               | 226        |
|           | Das Ziel: Aufbau der Gemeinde —                       | 228        |
| 9.6       | Die Auferstehung der Toten —                          | 229        |
|           | Die Basisgeschichte —                                 | 230        |
|           | Die Leugnung der Auferstehung —                       | 232        |
|           | Existenz und Leiblichkeit —                           | 234        |
| 9.7       | Kreuz, Gerechtigkeit und Gesetz —                     | 237        |
|           | Gerechtigkeit und Gesetz im 1Korintherbrief —         | 238        |
|           | Eine eigenständige Konzeption —                       | 241        |
| <b>10</b> | <b>Der 2Korintherbrief: Frieden und Krieg —</b>       | <b>243</b> |
| 10.1      | Die Ereignisse zwischen dem 1 und 2Korintherbrief —   | 243        |
| 10.2      | Der 2Korintherbrief als einheitlicher Brief —         | 245        |
|           | Die Hypothesen —                                      | 245        |
|           | Die strittigen Fragen —                               | 246        |
|           | Ein Lösungsvorschlag —                                | 250        |
| 10.3      | Die apostolische Existenz des Paulus —                | 253        |
|           | Kraft in der Schwachheit —                            | 253        |
|           | Die Lauterkeit des Apostels —                         | 255        |
|           | Das irdische und das himmlische Haus —                | 256        |
| 10.4      | Die Herrlichkeit des neuen Bundes —                   | 259        |
|           | Buchstabe und Geist —                                 | 260        |
|           | Der neue Bund —                                       | 261        |
| 10.5      | Die Botschaft der Versöhnung —                        | 264        |
|           | Der Versöhnungsdienst des Apostels —                  | 265        |
| 10.6      | Die Narrenrede —                                      | 267        |
|           | Die Gegner —                                          | 268        |
|           | Schein und Sein —                                     | 270        |

- 10.7 Der 2Korintherbrief und die Mission gegen Paulus — **273**
- 11 Paulus und die Galater: Erkenntnis im Konflikt — 275**
  - 11.1 Die Vorgeschichte — **275**
    - Die Provinzhypothese — **275**
    - Die Landschaftshypothese — **276**
    - Die Gründung der Gemeinden — **279**
    - Die Abfassung des Briefes — **280**
  - 11.2 Die galatische Krise — **282**
    - Der Anlass für die Krise — **284**
    - Die Reaktion des Paulus — **287**
  - 11.3 Die Gesetzes- und Rechtfertigungslehre des Galaterbriefes — **289**
    - Der Grundgedanke — **289**
    - Ein Schlüsselbegriff — **291**
    - Zwei anthropologische Ansätze — **294**
    - Partizipation in der Kraft des Geistes — **296**
    - Abraham als Identifikationsfigur — **298**
    - Funktion und Herkunft der Tora — **300**
    - Die Taufe als Statuswechsel — **303**
    - Folgerungen — **305**
  - 11.4 Die Ethik des Galaterbriefes — **308**
    - Die in der Liebe tätige Freiheit — **308**
  - 11.5 Inklusive und exklusive Rechtfertigungslehre bei Paulus — **310**
    - Erkenntniszuwachs in der Krise — **311**
    - Inklusive und exklusive Rechtfertigungslehre — **314**
- 12 Paulus und die Gemeinde in Rom: Begegnung auf hohem Niveau — 316**
  - 12.1 Die Geschichte und Struktur der römischen Gemeinde — **316**
  - 12.2 Der Römerbrief als situationsbedingtes Schreiben — **318**
    - Die Situation des Paulus — **319**
    - Die Situation der Gemeinde — **319**
    - Probleme des paulinischen Denkens — **320**
    - Positionen der Forschungsgeschichte — **321**
  - 12.3 Das Evangelium Jesu Christi — **324**
    - Inhalt und Herkunft des Evangeliums — **324**
    - Das Evangelium als rettende Macht — **325**
  - 12.4 Die Gotteserkenntnis der Heiden und Juden — **327**
    - Die Verblendung der Heiden — **328**
    - Die Verblendung der Juden — **329**

- 12.5 Die Gerechtigkeit Gottes — **332**
  - Positionen der Forschung — **333**
  - Gerechtigkeit Gottes als mehrdimensionaler Begriff — **334**
  - Das Gesetz des Glaubens — **337**
- 12.6 Paulus und das Alte Testament — **339**
  - Zwei Schlüsseltex te — **340**
  - Verheißung als Schlüsselkategorie — **341**
- 12.7 Die Gegenwart des Heils: Taufe und Gerechtigkeit — **343**
  - Adam-Christus-Typologie — **343**
  - Die Taufe als Transf ergeschehen — **346**
  - Die Entsprechung zum neuen Sein — **350**
- 12.8 Sünde, Gesetz und Freiheit im Geist — **351**
  - Ein Beispiel als Einstieg — **353**
  - Das verlorene Paradies — **354**
  - Das gefangene Ich — **356**
  - Der befreite Mensch — **360**
  - Fleisch und Geist — **362**
  - Die Herrlichkeit der Kinder Gottes — **364**
  - Die kosmologische Signatur des Römerbriefes — **366**
- 12.9 Paulus und Israel — **367**
  - Die Freiheit und Treue Gottes — **368**
  - Das Verhalten Israels — **371**
  - Die Rettung Israels — **373**
  - Paulus als Prophet — **377**
- 12.10 Die Gestalt des neuen Lebens — **378**
  - Vernunftgemä ße Ethik nach Gottes Willen — **378**
  - Im Schatten des Imperium Romanum — **381**
- 13 Paulus in Rom: Der alte Mann und sein Werk — 385**
- 13.1 Die Vorgeschichte: Paulus auf dem Weg nach Rom — **385**
  - Das Schicksal der Kollekte — **385**
  - Verhaftung und Prozess — **388**
  - Paulus in Rom — **390**
- 13.2 Der Philipperbrief — **392**
- 13.2.1 Ein Brief aus Rom nach Philippi — **392**
  - Der Haftort — **393**
- 13.2.2 Der Philipperbrief als ein spätes Zeugnis paulinischer Theologie — **398**
  - Der Hymnus als Modellgeschichte — **401**
  - Eine weitere Auseinandersetzung — **404**

- 13.3 Der Philemonbrief — 407  
Paulus leistet Überzeugungsarbeit — 408
- 13.4 Der Märtyrer Paulus — 411  
Der Bericht des Tacitus — 412  
Der Bericht des Sueton — 413  
Frühchristliche Traditionen — 414

## II. Hauptteil:

### Grundstrukturen paulinischen Denkens — 417

- 14 Heilsgegenwart als Zentrum paulinischer Theologie — 419  
Unausweichliche Aporien — 421
- 15 Theologie: Gott handelt — 423
  - 15.1 Der eine Gott als Schöpfer und Vollender — 423
  - 15.2 Gott als Vater Jesu Christi — 425  
Die Mittlerschaft des Sohnes — 427  
Kontinuität und Diskontinuität zum Judentum — 429
  - 15.3 Gott als Erwählender, Berufender und Verwerfender — 431  
Prädestination bei Paulus — 432
  - 15.4 Das Evangelium als endzeitliche Heilskundgabe Gottes — 434  
Der Ursprung des Evangeliums — 435  
Der Inhalt des Evangeliums — 435  
Evangelium als politisch-religiöser Begriff — 436
  - 15.5 Die Neuheit und Attraktivität der paulinischen Rede von Gott — 438
- 16 Christologie: Der Herr ist gegenwärtig — 441
  - 16.1 Transformation und Partizipation als Grundmodell paulinischer Christologie — 441
  - 16.2 Jesus Christus als Gekreuzigter und Auferstandener — 442
    - 16.2.1 Jesus Christus als Auferstandener — 443  
Der Realitätsgehalt des Auferstehungsgeschehens — 444  
Erklärungsmodelle — 446  
Auferstehung als Transzendenzgeschehen — 452  
Ein plausibler historischer Ablauf — 459
    - 16.2.2 Das Kreuz in der paulinischen Theologie — 462  
Das Kreuz als historischer Ort — 463  
Das Kreuz als argumentativ-theologischer Topos — 465  
Das Kreuz als Symbol — 466
  - 16.3 Jesus Christus als Retter und Befreier — 467

- Der Retter — **467**
- Der Befreier — **469**
- 16.4 Jesus als Messias, Herr und Sohn — **471**
  - „Christus“ — **471**
  - „Kyrios“ — **473**
  - „Gottessohn“ — **474**
  - Die textpragmatische Funktion der Hoheitstitel — **475**
- 16.5 Jesu Christi stellvertretender Tod ‚für uns‘ — **476**
- 16.6 Der Tod Jesu Christi als Sühnegeschehen — **481**
  - Die theologische Problematik der Opfervorstellung — **484**
- 16.7 Jesus Christus als Versöhner — **485**
- 16.8 Jesus Christus als Gottes Gerechtigkeit — **489**
- 16.8.1 Das kulturgeschichtliche Umfeld — **489**
  - Altes Testament — **489**
  - Antikes Judentum — **492**
  - Griechentum und Hellenismus — **495**
- 16.8.2 Die Genese der paulinischen Rechtfertigungslehre — **499**
  - Ein diachrones Modell — **502**
  - Die Universalisierung — **504**
- 16.8.3 Der theologische Gehalt der Rechtfertigungslehre — **505**
  - Die Grundthese — **507**
- 16.9 Gott, Jesus von Nazareth und die frühe Christologie — **509**
  - Griechisch-hellenistische Einflüsse — **511**
- 17 Soteriologie: Der Transfer hat begonnen — 515**
- 17.1 Das neue Sein als Partizipation an Christus — **516**
  - Partizipation in der Taufe — **517**
  - „In Christus“ — **519**
- 17.2 Die neue Zeit zwischen den Zeiten — **520**
  - „Gnade“ — **521**
  - „Rettung“ — **524**
- 18 Pneumatologie: Der Geist weht und wirkt — 526**
- 18.1 Der Geist als vernetzendes Prinzip des paulinischen Denkens — **526**
- 18.2 Die Gaben und aktuellen Wirkungen des Geistes — **532**
- 18.3 Der Vater, der Sohn und der Geist — **534**
- 19 Anthropologie: Der Kampf um das Ich — 536**
- 19.1 Menschsein und Leiblichkeit: σῶμα und σάρξ — **536**
  - „Soma“ — **536**



- „Sarx“ — **540**
- 19.2 Die Sünde und der Tod — **542**
  - Die Sünde als vorgängige Macht — **543**
  - Der Ursprung des Bösen — **545**
- 19.3 Das Gesetz — **549**
  - Das Gesetz im griechisch-römischen Denken — **550**
- 19.3.1 Die diachrone Analyse — **555**
  - Die frühe Zeit — **555**
  - Der Apostelkonvent — **556**
  - Die galatische Krise — **558**
- 19.3.2 Die synchrone Analyse — **561**
  - Aussagen über das Gesetz/die Tora — **561**
  - Denkerische Probleme — **563**
  - Neudefinition als Lösung — **564**
- 19.4 Der Glaube als Neuqualifikation des Ich — **567**
  - Der Glaube als Geschenk — **568**
  - Strukturelemente des Glaubens — **573**
  - „Glaube/glauben“ in den kulturellen Kontexten — **574**
  - Neue Akzente — **576**
- 19.5 Zentren des menschlichen Selbst — **577**
  - „Gewissen“ — **578**
  - „Eikon“ — **581**
  - „Herz“ — **583**
  - „Psyche“ — **585**
  - „Nous“ — **586**
  - „Innerer und äußerer Mensch“ — **587**
- 19.6 Die neue Freiheit — **588**
  - Der Grundansatz — **589**
  - Antike Freiheitstheorien — **594**
- 20 Ethik: Das neue Sein als Sinngestaltung — 597**
- 20.1 Der Grundansatz: Leben im Raum des Christus — **597**
  - Entsprechung als ethische Grundkategorie — **599**
- 20.2 Die Praxis des neuen Seins — **603**
- 21 Ekklesiologie: Eine anspruchsvolle und attraktive Gemeinschaft — 611**
- 21.1 Grundworte und Basismetaphern paulinischer Ekklesiologie — **611**
  - Grundworte — **611**
  - Basismetaphern — **614**
- 21.2 Strukturen und Aufgaben in den Gemeinden — **619**

|           |                                                                   |            |
|-----------|-------------------------------------------------------------------|------------|
|           | Jesus Christus als Modell —                                       | 619        |
|           | Nachahmersein —                                                   | 620        |
|           | Charisma und Amt —                                                | 621        |
|           | Ämter —                                                           | 623        |
| 21.3      | Die Gemeinde als sündenfreier Raum —                              | 626        |
| <b>22</b> | <b>Eschatologie: Erwartung und Erinnerung —</b>                   | <b>630</b> |
| 22.1      | Die Zukunft in der Gegenwart —                                    | 630        |
|           | Teilhabe am Auferstandenen —                                      | 630        |
|           | Eschatologische Existenz —                                        | 633        |
| 22.2      | Der Ablauf der Endereignisse und die postmortale Existenz —       | 634        |
|           | Wandlungen —                                                      | 635        |
|           | Leiblichkeit und postmortale Existenz —                           | 640        |
| 22.3      | Das Schicksal Israels —                                           | 642        |
| 22.4      | Eschatologie als Zeitkonstruktion —                               | 646        |
|           | Antike Todestheorien —                                            | 648        |
| 22.5      | Eschatologie und Kosmologie —                                     | 651        |
|           | Kritik am Imperium Romanum? —                                     | 655        |
| <b>23</b> | <b>Epilog: Das paulinische Denken als bleibende Sinnbildung —</b> | <b>658</b> |
|           | Ein philosophisches Modell —                                      | 660        |
|           | Gott als sinnvolle Letztbegründung —                              | 662        |
|           | <b>Literaturverzeichnis —</b>                                     | <b>665</b> |
| I         | Textausgaben, Textsammlungen —                                    | 665        |
| II        | Lexika, Wörterbücher, Grammatiken —                               | 667        |
| III       | Kommentare, Monographien, Aufsätze, Artikel —                     | 668        |
|           | <b>Autorenregister —</b>                                          | <b>690</b> |
|           | <b>Stellenregister (in Auswahl) —</b>                             | <b>701</b> |
